# Supplementary material for: BCL2-Family Dysregulation in B-Cell Malignancies: From Gene Expression Regulation to a Targeted Therapy Biomarker
Source: Front Oncol. 2019 Jan 7;8:645. doi: 10.3389/fonc.2018.00645 (PMC6330761; doi:10.3389/fonc.2018.00645)
Supplement: Supplementary file 2 [file Table_1.XLSX]

## Sheet: Table_batch.pheno.txt
		GSE19784	GSE93261	GSE93291	GSE12195	GSE4732	GSE21029	GSE16455	GSE70910	GSE81183	GSE36000	GSE13314	GSE12453	GSE39577	GSE15271	E-MATB-1771	E-MEXP-2360	E-MTAB-1991	GSE35348	GSE35426	GSE25550	GSE18736	GSE35082	GSE17186
	NaiveB												5			5								2
	MCL			116				22	55		38							7		3		5
	Centroblast														4
	BL					24							5
	DLBCL				71	74							11
	Centrocyte														4
	FL		149		38			7		42			5							5		5
	MemoryB												5				5							2
	BPLL																	13
	CLL						62	17										7
	HCL							5
	MALT											35		30							14
	SMZL							4											27	14			9
	PlasmaCell																5
	MM	328
		GSE19784: downloaded from GEO
		E-MATB-1771: downloaded from ArrayExpress								Supplementl Table S1. Samples and Gene expression profiling datasets used in the study
